# Supplementary material
Source: MDPI journal article supplement (https://www.mdpi.com/2073-4395/12/10/2328)
Supplement: s1 [file s1]

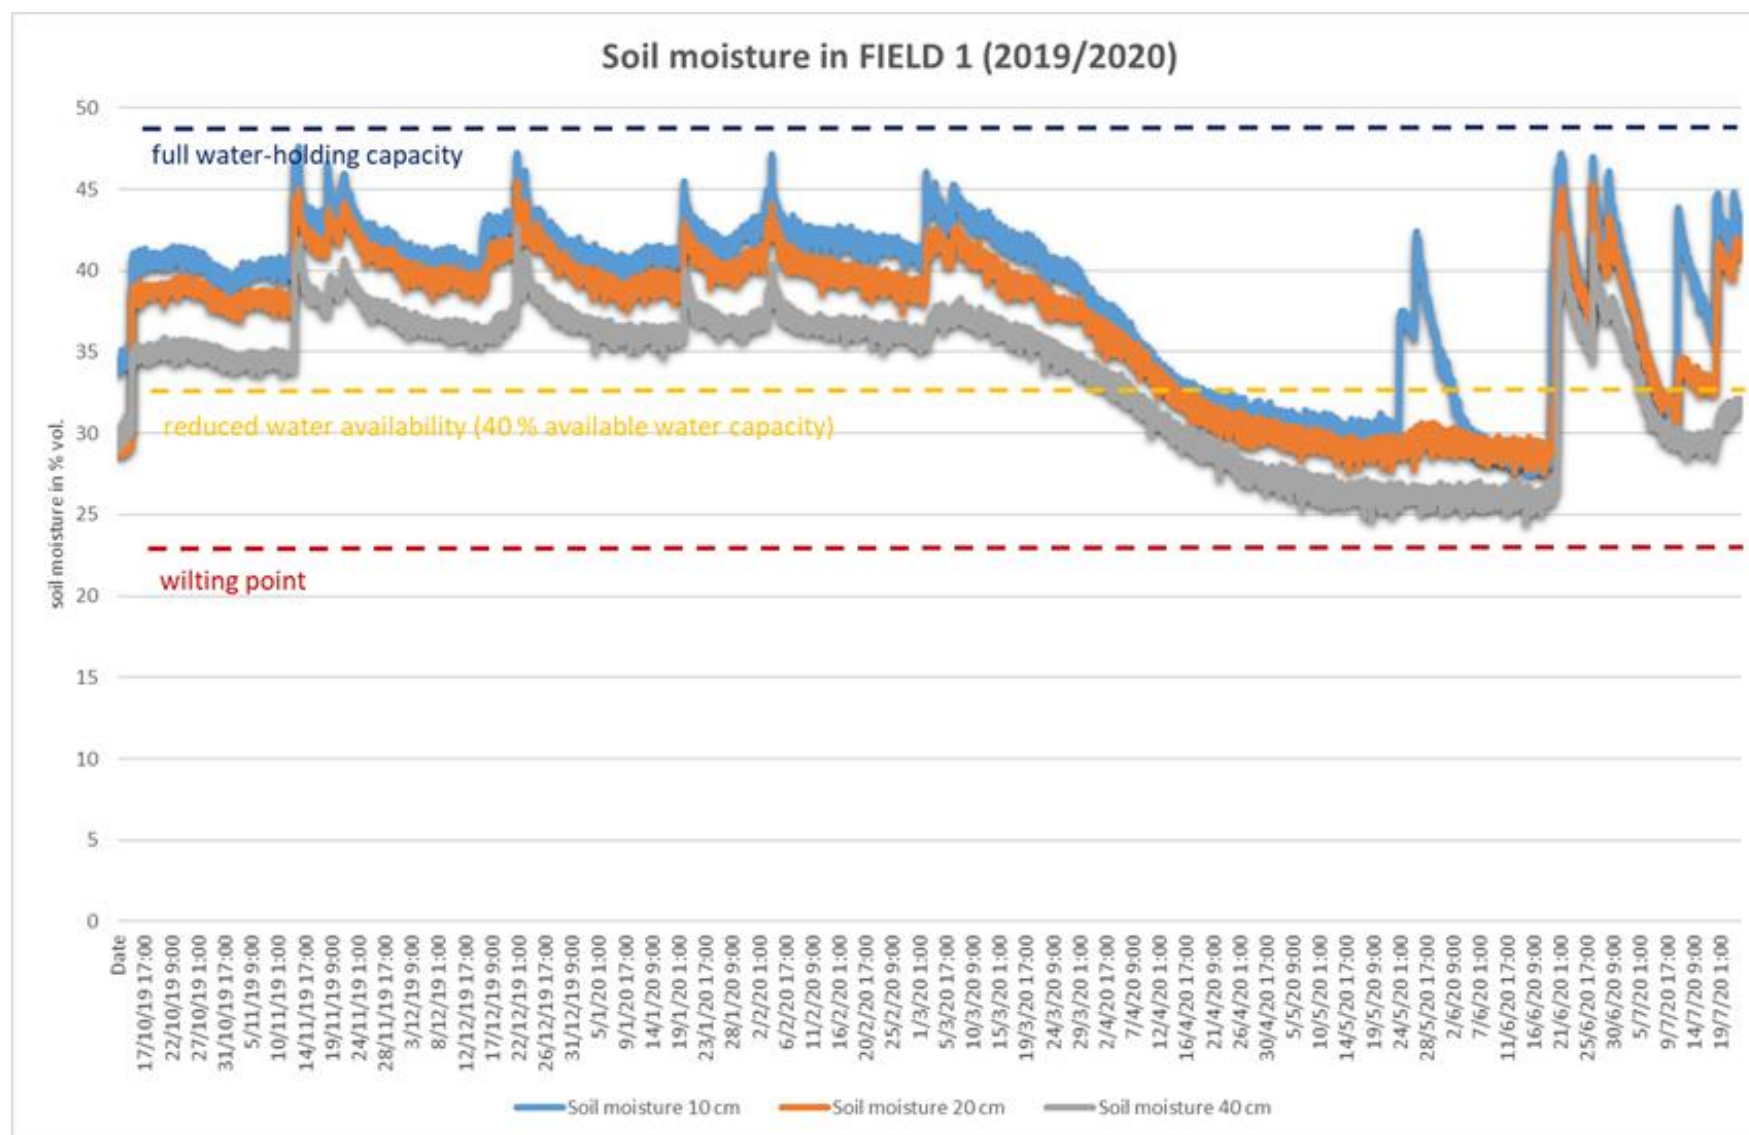

**Figure S1.** Soil moisture in FIELD 1 during the growing season 2019/2020.

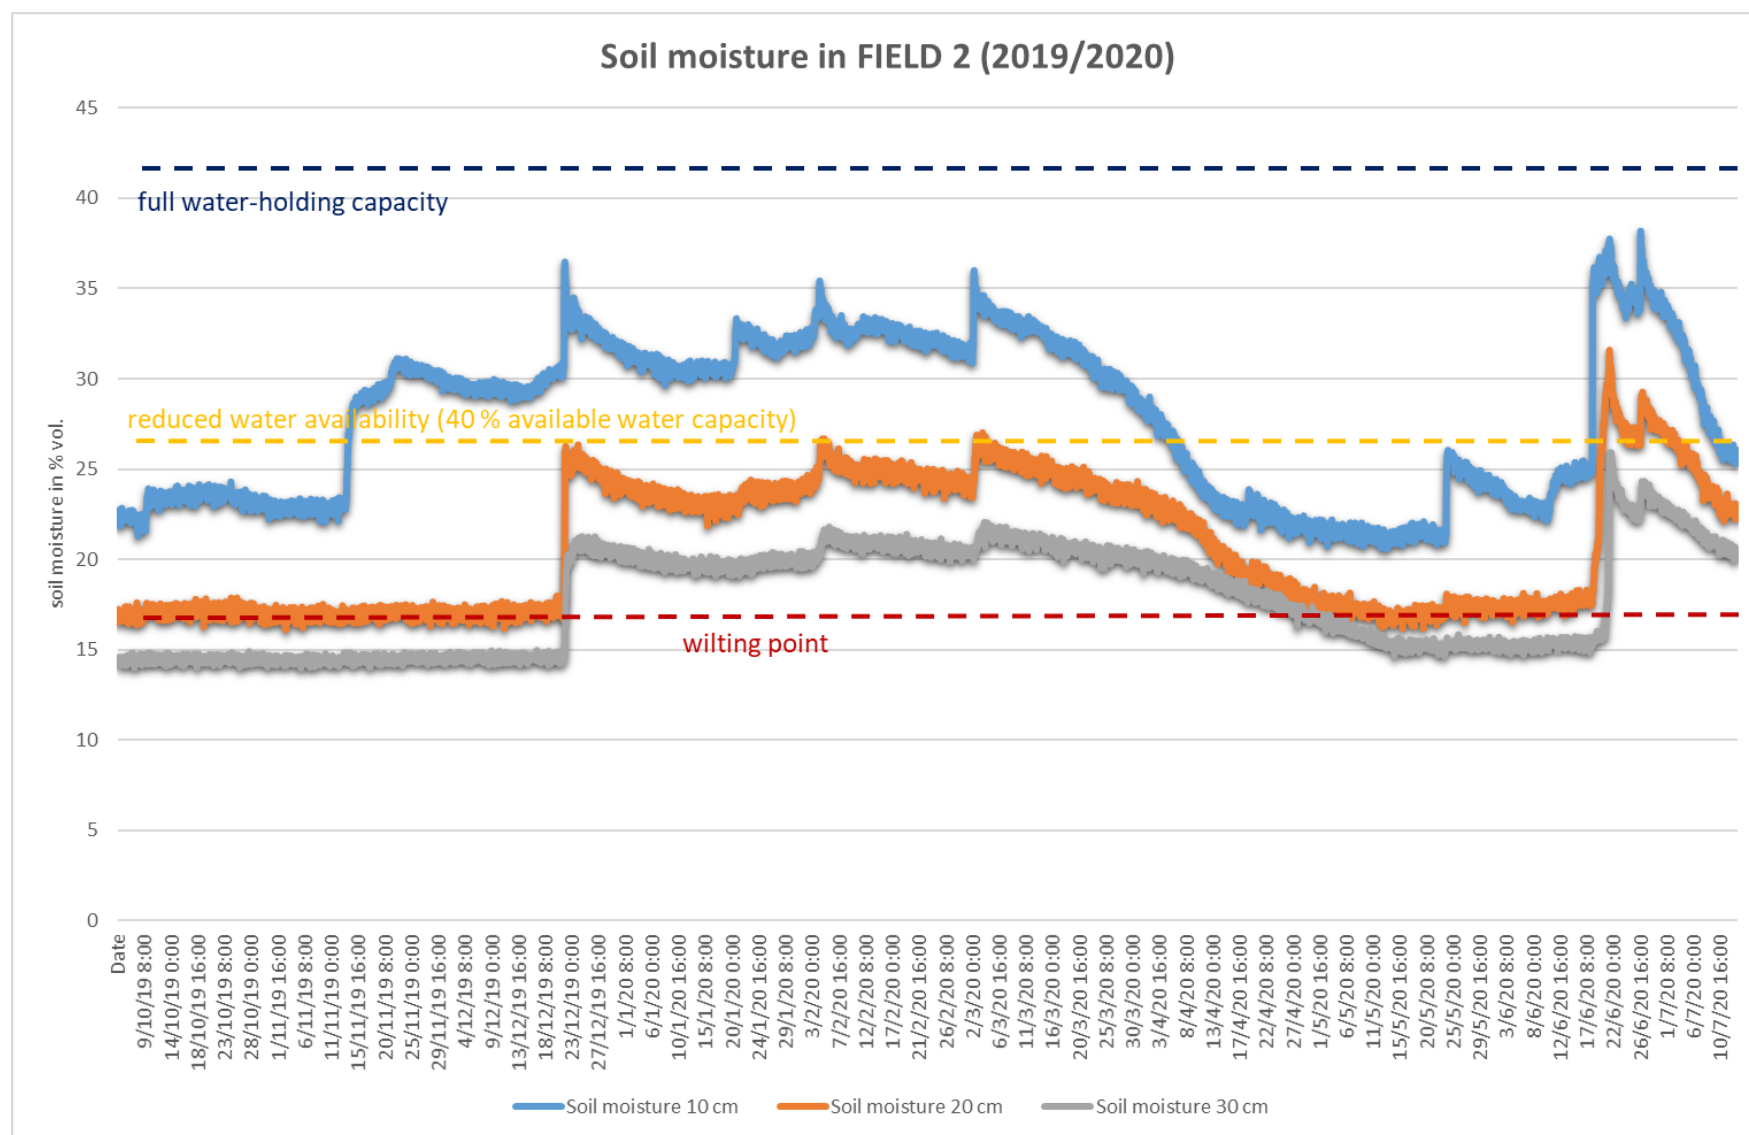

**Figure S2.** Soil moisture in FIELD 2 during the growing season 2019/2020.

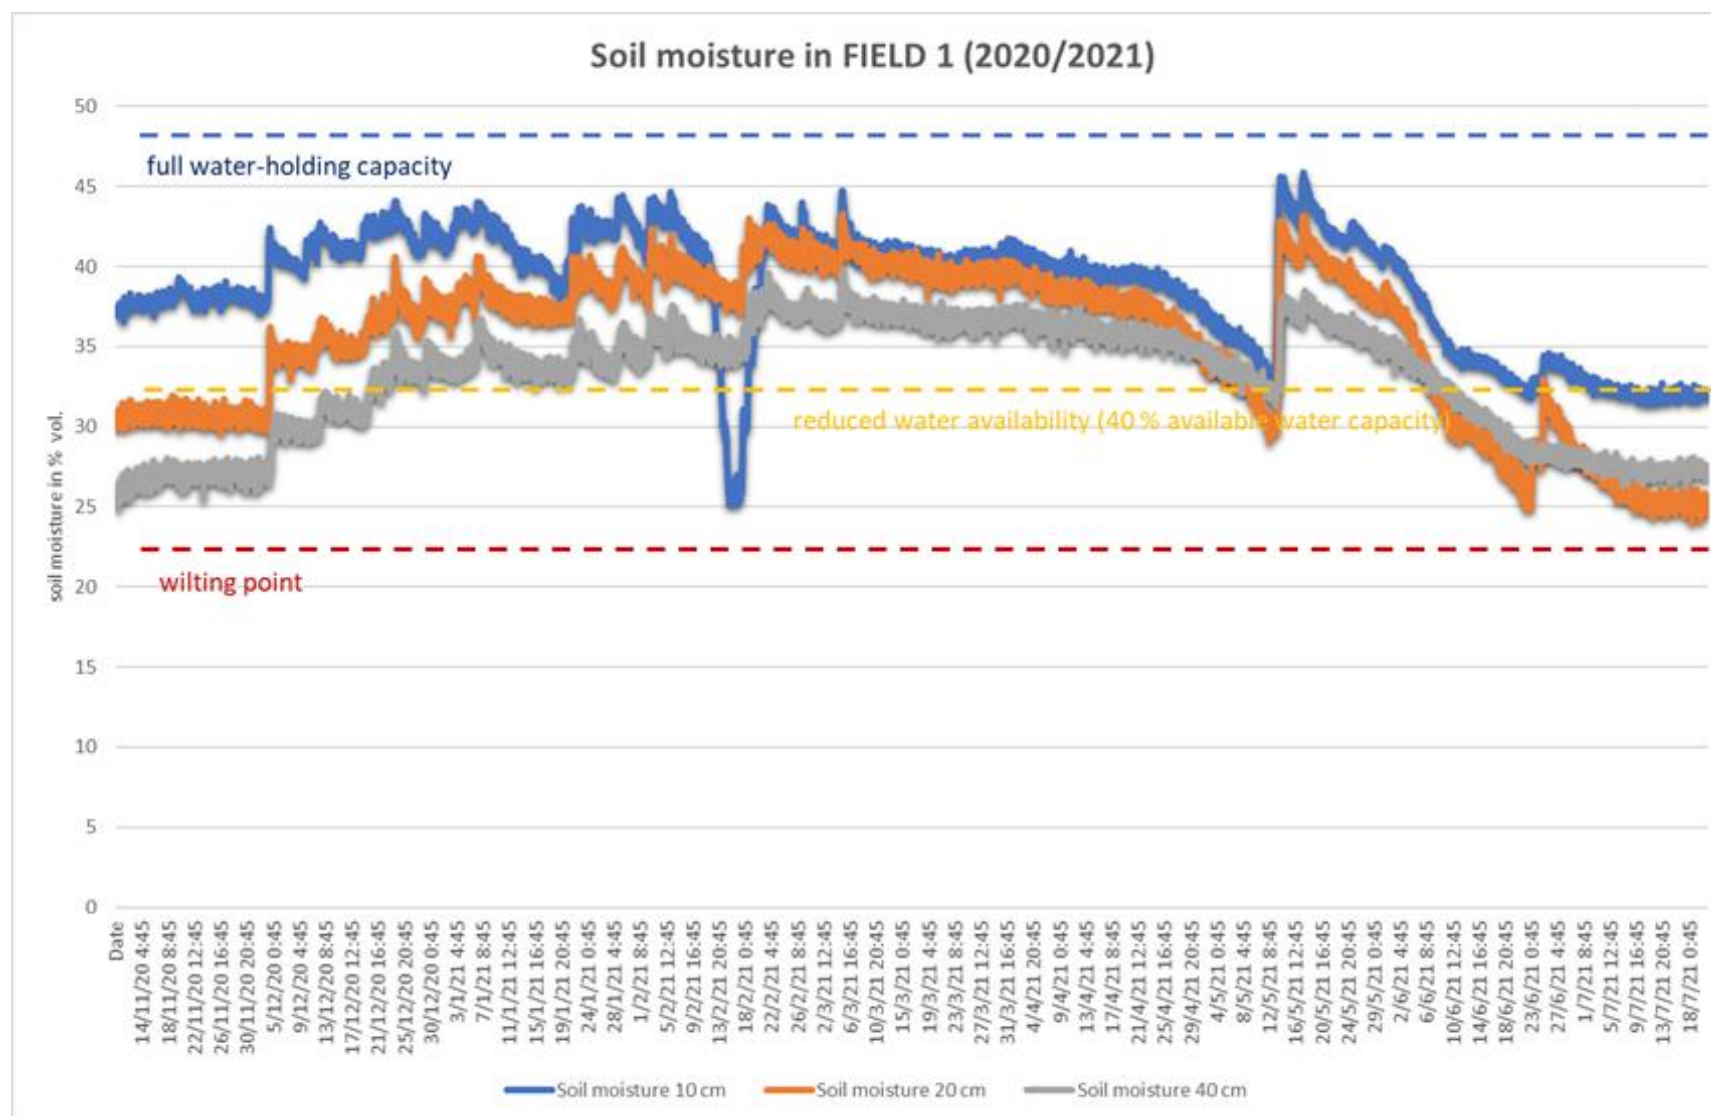

**Figure S3.** Soil moisture in FIELD 1 during the growing season 2020/2021.

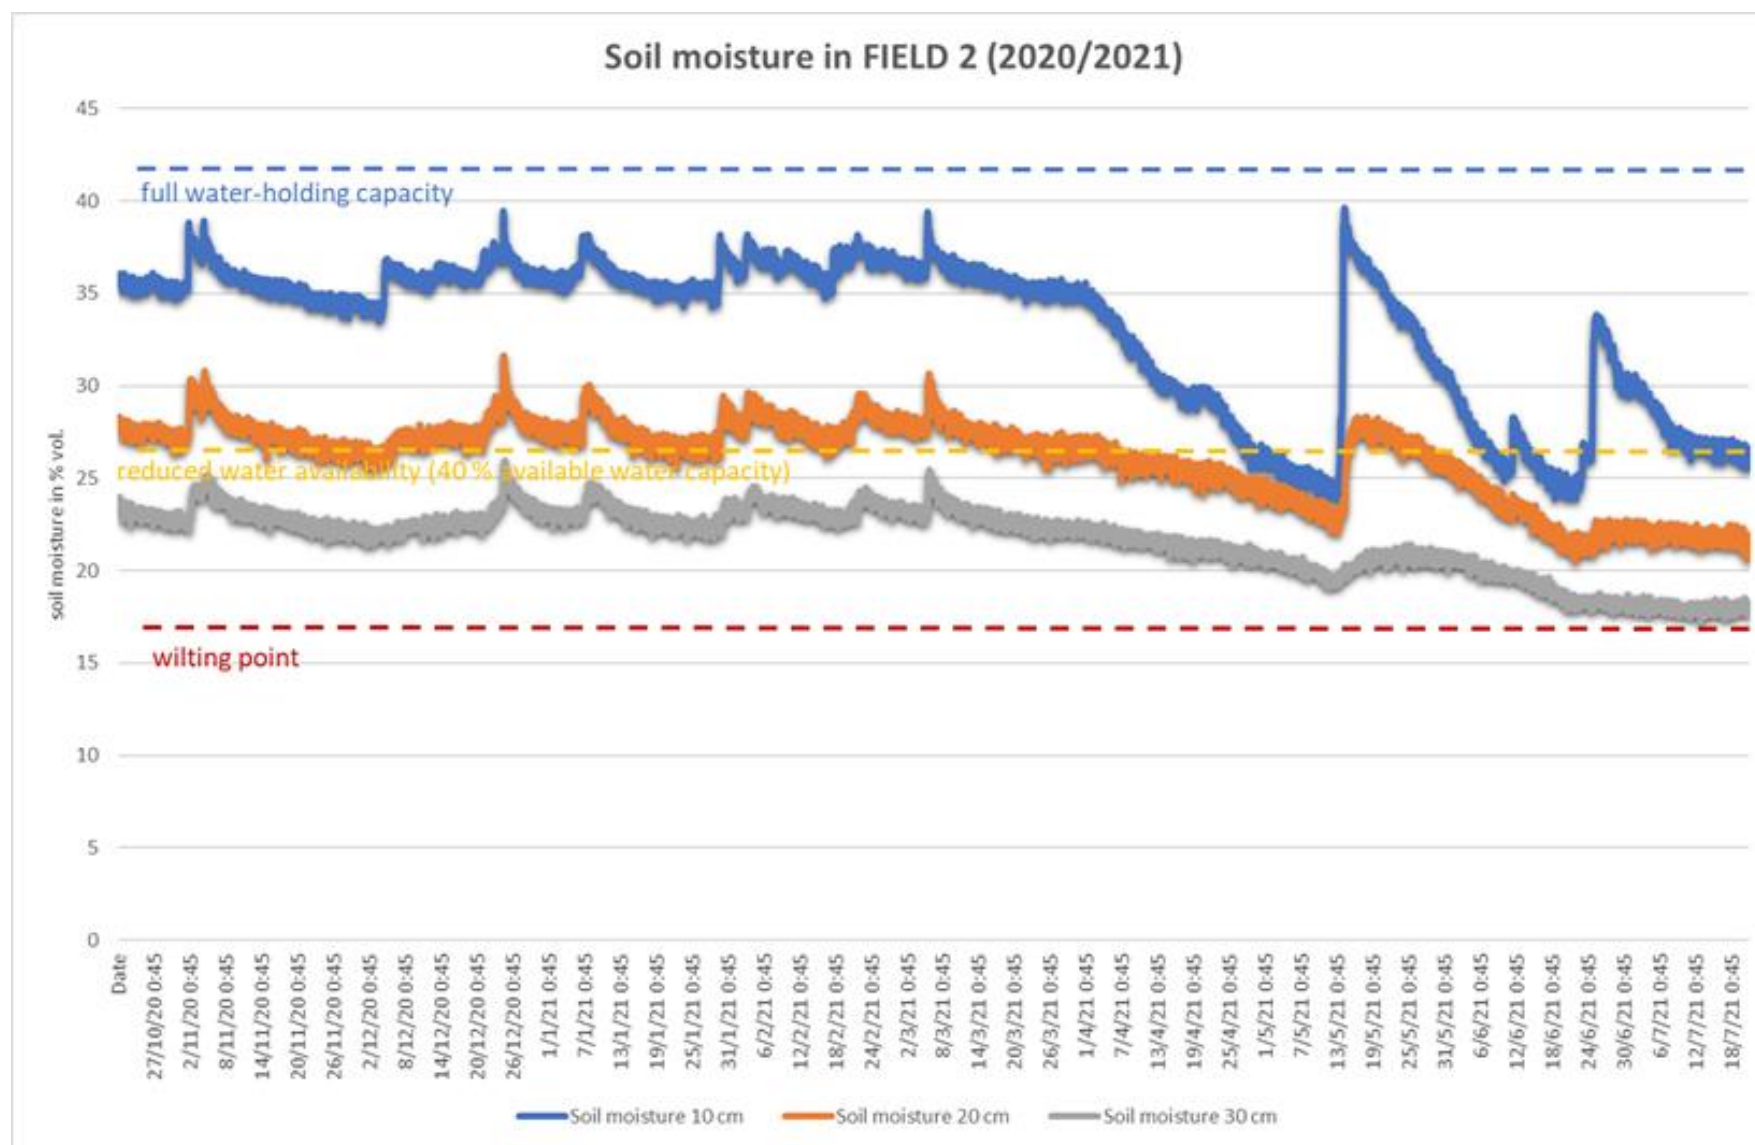

Figure S4. Soil moisture in FIELD 2 during the growing season 2020/2021.

**Table S1.** Fertilisers dosages and forms.

| <i>form</i>                             | Fertilisers       | <i>form</i>                     | 2020/2021 |
|-----------------------------------------|-------------------|---------------------------------|-----------|
|                                         | FIELD 1           |                                 |           |
|                                         | 2019/2020         |                                 |           |
| triple superphosphate                   | 90 kg P2O5        |                                 |           |
| potassium chloride                      | 120 kg K2O        |                                 |           |
| ammonium nitrate with dolomite          | 50 Kg N           | ammonium nitrate with limestone | 50 kg N   |
| ammonium nitrate with urea              | 60 kg N           | ammonium nitrate with urea      | 60 kg N   |
| ammonium nitrate with limestone         | 40 kg N           |                                 |           |
| <i>form</i>                             | FIELD 2           | <i>form</i>                     | 2020/2021 |
|                                         | 2019/2020         |                                 |           |
| ammonium nitrate with ammonium sulphate | 50 kg N + 25 kg S | ammonium nitrate with limestone | 30 kg N   |
| ammonium nitrate with urea              | 40 kg N           |                                 |           |

**Table S2.** Soil texture and the percentage of soil separates.

| Location       | Soil Texture    | Soil Separates            |                                |                            |
|----------------|-----------------|---------------------------|--------------------------------|----------------------------|
|                |                 | Sand (particles >0.05 mm) | Silt (particles 0.001-0.05 mm) | Clay (particles <0,001 mm) |
| <b>FIELD 1</b> | silty clay loam | 15.70%                    | 53.40%                         | 31.00%                     |
| <b>FIELD 2</b> | loam            | 47.20%                    | 34.80%                         | 18.00%                     |

**Table S3.** Spearman correlation matrix for the data of **FIELD 1**. Values in bold are different from 0 with a significance level  $\alpha=0.05$ .

| Variables                 | Spike Length  | Total Spikelet Number | Fertile Spikelets | Fertile Flowers | Spike Density | Spike Fertility | Spike Length (2) | Total Spikelet Number (2) | Fertile Spikelets (2) | Grain Number  | Spike Density (2) | Spike Fertility (2) | TKW           | Yield         | HI            | Spikes/m2     |
|---------------------------|---------------|-----------------------|-------------------|-----------------|---------------|-----------------|------------------|---------------------------|-----------------------|---------------|-------------------|---------------------|---------------|---------------|---------------|---------------|
| Spike Length              | <b>1</b>      | <b>0.548</b>          | <b>0.397</b>      | 0.047           | <b>-0.902</b> | 0.056           | <b>0.553</b>     | <b>0.381</b>              | <b>0.266</b>          | 0.099         | <b>-0.473</b>     | 0.046               | 0.154         | <b>-0.590</b> | <b>-0.507</b> | <b>0.369</b>  |
| Total Spikelet Number     | <b>0.548</b>  | <b>1</b>              | <b>0.745</b>      | <b>0.238</b>    | <b>-0.176</b> | <b>0.179</b>    | <b>0.242</b>     | 0.160                     | <b>0.288</b>          | 0.105         | <b>-0.209</b>     | <b>0.286</b>        | 0.080         | <b>-0.424</b> | <b>-0.347</b> | <b>0.355</b>  |
| Fertile Spikelets         | <b>0.397</b>  | <b>0.745</b>          | <b>1</b>          | <b>0.641</b>    | -0.115        | <b>0.763</b>    | 0.117            | 0.096                     | <b>0.229</b>          | 0.082         | -0.100            | <b>0.249</b>        | -0.033        | <b>-0.319</b> | <b>-0.217</b> | <b>0.245</b>  |
| Fertile Flowers           | 0.047         | <b>0.238</b>          | <b>0.641</b>      | <b>1</b>        | 0.066         | <b>0.713</b>    | -0.116           | -0.080                    | -0.014                | 0.123         | 0.097             | 0.078               | <b>-0.311</b> | <b>-0.230</b> | -0.165        | <b>0.224</b>  |
| Spike Density             | <b>-0.902</b> | <b>-0.176</b>         | -0.115            | 0.066           | <b>1</b>      | 0.023           | <b>-0.539</b>    | <b>-0.339</b>             | -0.155                | -0.048        | <b>0.474</b>      | 0.086               | -0.149        | <b>0.454</b>  | <b>0.412</b>  | <b>-0.250</b> |
| Spike Fertility           | 0.056         | <b>0.179</b>          | <b>0.763</b>      | <b>0.713</b>    | 0.023         | <b>1</b>        | -0.074           | -0.055                    | 0.078                 | 0.050         | 0.051             | 0.155               | -0.085        | -0.018        | 0.027         | 0.023         |
| Spike Length (2)          | <b>0.553</b>  | <b>0.242</b>          | 0.117             | -0.116          | <b>-0.539</b> | -0.074          | <b>1</b>         | <b>0.577</b>              | <b>0.474</b>          | 0.164         | <b>-0.877</b>     | 0.093               | <b>0.325</b>  | <b>-0.287</b> | -0.155        | 0.115         |
| Total Spikelet Number (2) | <b>0.381</b>  | 0.160                 | 0.096             | -0.080          | <b>-0.339</b> | -0.055          | <b>0.577</b>     | <b>1</b>                  | <b>0.616</b>          | <b>0.239</b>  | -0.158            | -0.022              | 0.097         | <b>-0.372</b> | <b>-0.205</b> | 0.143         |
| Fertile Spikelets (2)     | <b>0.266</b>  | <b>0.288</b>          | <b>0.229</b>      | -0.014          | -0.155        | 0.078           | <b>0.474</b>     | <b>0.616</b>              | <b>1</b>              | <b>0.471</b>  | <b>-0.197</b>     | <b>0.742</b>        | 0.088         | -0.120        | <b>-0.244</b> | <b>0.215</b>  |
| Grain Number              | 0.099         | 0.105                 | 0.082             | 0.123           | -0.048        | 0.050           | 0.164            | <b>0.239</b>              | <b>0.471</b>          | <b>1</b>      | -0.019            | <b>0.454</b>        | <b>-0.365</b> | -0.158        | <b>-0.480</b> | <b>0.494</b>  |
| Spike Density (2)         | <b>-0.473</b> | <b>-0.209</b>         | -0.100            | 0.097           | <b>0.474</b>  | 0.051           | <b>-0.877</b>    | -0.158                    | <b>-0.197</b>         | -0.019        | <b>1</b>          | -0.081              | <b>-0.344</b> | <b>0.181</b>  | 0.076         | -0.038        |
| Spike Fertility (2)       | 0.046         | <b>0.286</b>          | <b>0.249</b>      | 0.078           | 0.086         | 0.155           | 0.093            | -0.022                    | <b>0.742</b>          | <b>0.454</b>  | -0.081            | <b>1</b>            | -0.002        | 0.117         | <b>-0.206</b> | <b>0.246</b>  |
| TKW                       | 0.154         | 0.080                 | -0.033            | <b>-0.311</b>   | -0.149        | -0.085          | <b>0.325</b>     | 0.097                     | 0.088                 | <b>-0.365</b> | <b>-0.344</b>     | -0.002              | <b>1</b>      | <b>0.313</b>  | <b>0.512</b>  | <b>-0.539</b> |
| Yield                     | <b>-0.590</b> | <b>-0.424</b>         | <b>-0.319</b>     | <b>-0.230</b>   | <b>0.454</b>  | -0.018          | <b>-0.287</b>    | <b>-0.372</b>             | -0.120                | -0.158        | <b>0.181</b>      | 0.117               | <b>0.313</b>  | <b>1</b>      | <b>0.648</b>  | <b>-0.541</b> |
| HI                        | <b>-0.507</b> | <b>-0.347</b>         | <b>-0.217</b>     | -0.165          | <b>0.412</b>  | 0.027           | -0.155           | <b>-0.205</b>             | <b>-0.244</b>         | <b>-0.480</b> | 0.076             | <b>-0.206</b>       | <b>0.512</b>  | <b>0.648</b>  | <b>1</b>      | <b>-0.847</b> |
| Spikes/m2                 | <b>0.369</b>  | <b>0.355</b>          | <b>0.245</b>      | <b>0.224</b>    | <b>-0.250</b> | 0.023           | 0.115            | 0.143                     | <b>0.215</b>          | <b>0.494</b>  | -0.038            | <b>0.246</b>        | <b>-0.539</b> | <b>-0.541</b> | <b>-0.847</b> | <b>1</b>      |

**Table S4.** Spearman correlation matrix for the data of FIELD 2. Values in bold are different from 0 with a significance level alpha=0.05.

| Variables                 | Spike Length  | Total Spikelet Number | Fertile Spikelets | Fertile Flowers | Spike Density | Spike Fertility | Spike Length (2) | Total Spikelet Number (2) | Fertile Spikelets (2) | Grain Number  | Spike Density (2) | Spike Fertility (2) | TKW           | Yield         | HI            | Spikes/m2     |
|---------------------------|---------------|-----------------------|-------------------|-----------------|---------------|-----------------|------------------|---------------------------|-----------------------|---------------|-------------------|---------------------|---------------|---------------|---------------|---------------|
| Spike Length              | <b>1</b>      | <b>0.575</b>          | <b>0.582</b>      | <b>0.471</b>    | <b>-0.865</b> | <b>0.286</b>    | <b>0.654</b>     | <b>0.376</b>              | <b>0.208</b>          | <b>0.276</b>  | <b>-0.588</b>     | -0.020              | <b>0.435</b>  | <b>-0.212</b> | <b>-0.339</b> | 0.153         |
| Total Spikelet Number     | <b>0.575</b>  | <b>1</b>              | <b>0.636</b>      | <b>0.244</b>    | -0.128        | 0.012           | <b>0.344</b>     | <b>0.261</b>              | 0.053                 | 0.139         | <b>-0.254</b>     | -0.102              | 0.037         | -0.096        | <b>-0.290</b> | <b>0.205</b>  |
| Fertile Spikelets         | <b>0.582</b>  | <b>0.636</b>          | <b>1</b>          | <b>0.763</b>    | <b>-0.331</b> | <b>0.743</b>    | <b>0.264</b>     | <b>0.220</b>              | 0.099                 | 0.124         | <b>-0.183</b>     | -0.009              | 0.065         | -0.021        | <b>-0.167</b> | -0.091        |
| Fertile Flowers           | <b>0.471</b>  | <b>0.244</b>          | <b>0.763</b>      | <b>1</b>        | <b>-0.445</b> | <b>0.813</b>    | 0.079            | 0.054                     | -0.047                | 0.017         | -0.070            | -0.084              | 0.122         | -0.041        | 0.016         | -0.077        |
| Spike Density             | <b>-0.865</b> | -0.128                | <b>-0.331</b>     | <b>-0.445</b>   | <b>1</b>      | <b>-0.332</b>   | <b>-0.580</b>    | <b>-0.285</b>             | <b>-0.207</b>         | <b>-0.203</b> | <b>0.560</b>      | -0.029              | <b>-0.543</b> | <b>0.240</b>  | <b>0.193</b>  | -0.058        |
| Spike Fertility           | <b>0.286</b>  | 0.012                 | <b>0.743</b>      | <b>0.813</b>    | <b>-0.332</b> | <b>1</b>        | 0.029            | 0.089                     | 0.098                 | 0.000         | 0.027             | 0.073               | 0.054         | 0.010         | 0.039         | <b>-0.314</b> |
| Spike Length (2)          | <b>0.654</b>  | <b>0.344</b>          | <b>0.264</b>      | 0.079           | <b>-0.580</b> | 0.029           | <b>1</b>         | <b>0.550</b>              | <b>0.506</b>          | <b>0.557</b>  | <b>-0.883</b>     | <b>0.219</b>        | <b>0.483</b>  | <b>-0.299</b> | <b>-0.243</b> | <b>0.276</b>  |
| Total Spikelet Number (2) | <b>0.376</b>  | <b>0.261</b>          | <b>0.220</b>      | 0.054           | <b>-0.285</b> | 0.089           | <b>0.550</b>     | <b>1</b>                  | <b>0.552</b>          | <b>0.290</b>  | -0.152            | 0.022               | <b>0.170</b>  | <b>-0.170</b> | -0.164        | -0.013        |
| Fertile Spikelets (2)     | <b>0.208</b>  | 0.053                 | 0.099             | -0.047          | <b>-0.207</b> | 0.098           | <b>0.506</b>     | <b>0.552</b>              | <b>1</b>              | <b>0.546</b>  | <b>-0.297</b>     | <b>0.809</b>        | <b>0.198</b>  | -0.038        | -0.154        | -0.061        |
| Grain Number              | <b>0.276</b>  | 0.139                 | 0.124             | 0.017           | <b>-0.203</b> | 0.000           | <b>0.557</b>     | <b>0.290</b>              | <b>0.546</b>          | <b>1</b>      | <b>-0.515</b>     | <b>0.451</b>        | 0.158         | <b>0.186</b>  | <b>-0.378</b> | <b>0.327</b>  |
| Spike Density (2)         | <b>-0.588</b> | <b>-0.254</b>         | <b>-0.183</b>     | -0.070          | <b>0.560</b>  | 0.027           | <b>-0.883</b>    | -0.152                    | <b>-0.297</b>         | <b>-0.515</b> | <b>1</b>          | <b>-0.243</b>       | <b>-0.512</b> | <b>0.271</b>  | <b>0.217</b>  | <b>-0.325</b> |
| Spike Fertility (2)       | -0.020        | -0.102                | -0.009            | -0.084          | -0.029        | 0.073           | <b>0.219</b>     | 0.022                     | <b>0.809</b>          | <b>0.451</b>  | <b>-0.243</b>     | <b>1</b>            | 0.089         | 0.093         | -0.057        | -0.091        |
| TKW                       | <b>0.435</b>  | 0.037                 | 0.065             | 0.122           | <b>-0.543</b> | 0.054           | <b>0.483</b>     | <b>0.170</b>              | <b>0.198</b>          | 0.158         | <b>-0.512</b>     | 0.089               | <b>1</b>      | <b>-0.400</b> | 0.053         | <b>0.337</b>  |
| Yield                     | <b>-0.212</b> | -0.096                | -0.021            | -0.041          | <b>0.240</b>  | 0.010           | <b>-0.299</b>    | <b>-0.170</b>             | -0.038                | <b>0.186</b>  | <b>0.271</b>      | 0.093               | <b>-0.400</b> | <b>1</b>      | <b>-0.232</b> | -0.151        |
| HI                        | <b>-0.339</b> | <b>-0.290</b>         | <b>-0.167</b>     | 0.016           | <b>0.193</b>  | 0.039           | <b>-0.243</b>    | -0.164                    | -0.154                | <b>-0.378</b> | <b>0.217</b>      | -0.057              | 0.053         | <b>-0.232</b> | <b>1</b>      | -0.144        |
| Spikes/m2                 | 0.153         | <b>0.205</b>          | -0.091            | -0.077          | -0.058        | <b>-0.314</b>   | <b>0.276</b>     | -0.013                    | -0.061                | <b>0.327</b>  | <b>-0.325</b>     | -0.091              | <b>0.337</b>  | -0.151        | -0.144        | <b>1</b>      |

Table S5. Mean values of the observed traits for all varieties.

| V           | Y     | S   | SL                | TS<br>N      | FS           | FF           | SD          | SF           | SL2                | TS<br>N2     | FS2          | GN           | SD2         | SF2          | TK<br>W      | Yie          | HI          | S/m <sup>2</sup>   |
|-------------|-------|-----|-------------------|--------------|--------------|--------------|-------------|--------------|--------------------|--------------|--------------|--------------|-------------|--------------|--------------|--------------|-------------|--------------------|
| Balitus     | 19/20 | F 1 | 98.7<br>±4.8      | 20.3<br>±0.5 | 17.1<br>±0.9 | 46.4<br>±4.2 | 0.2±<br>0.0 | 84.2<br>±3.2 | 92.0<br>±7.0       | 20.0<br>±1.1 | 18.0<br>±1.3 | 53.2<br>±8.4 | 0.2±<br>0.0 | 90.0<br>±3.5 | 43.3<br>±2.4 | 11.9<br>±0.6 | 0.4±<br>0.1 | 815.<br>0±51<br>.7 |
|             |       | F 2 | 94.4<br>±5.5      | 19.6<br>±0.8 | 18.0<br>±1.0 | 61.8<br>±5.9 | 0.2±<br>0.0 | 91.8<br>±2.6 | 92.8<br>±11.<br>9  | 18.8<br>±1.0 | 16.3<br>±1.6 | 46.6<br>±9.8 | 0.2±<br>0.0 | 86.6<br>±4.7 | 42.1<br>±0.6 | 5.51<br>±0.2 | 0.4±<br>0.1 | 540±<br>19.5       |
|             | 20/21 | F 1 | 92.3<br>±3.8      | 20.0<br>±0.7 | 18.0<br>±1.0 | 53.4<br>±5.4 | 0.2±<br>0.0 | 90.0<br>±4.0 | 83.1<br>±4.6       | 19.1<br>±1.0 | 16.3<br>±1.2 | 41.3<br>±4.0 | 0.2±<br>0.0 | 85.3<br>±3.4 | 43.3<br>±0.2 | 11.2<br>±0.4 | 0.6±<br>0.9 | 640±<br>50.1       |
|             |       | F 2 | 83.9<br>±6.7      | 18.1<br>±1.0 | 16.2<br>±0.9 | 46.5<br>±8.2 | 0.2±<br>0.0 | 89.6<br>±3.9 | 75.8<br>±3.5       | 18.9<br>±0.7 | 15.9<br>±0.9 | 37.9<br>±6.1 | 0.2±<br>0.0 | 84.2<br>±5.7 | 40.6<br>±1.6 | 6.1±<br>0.4  | 0.4±<br>0.0 | 415.<br>0±16<br>.2 |
| Bohemia     | 19/20 | F 1 | 130.<br>0±9.<br>5 | 21.2<br>±0.6 | 18.5<br>±1.3 | 51.1<br>±9.3 | 0.2±<br>0.0 | 87.2<br>±4.7 | 114.<br>0±5.<br>7  | 20.2<br>±1.0 | 17.7<br>±1.1 | 52.2<br>±2.5 | 0.2±<br>0.0 | 87.9<br>±7.6 | 45.3<br>±1.9 | 10.8<br>±0.4 | 0.4±<br>0.1 | 890.<br>0±1.<br>0  |
|             |       | F 2 | 117.<br>0±8.<br>6 | 19.5<br>±0.8 | 16.6<br>±1.4 | 47.4<br>±8.8 | 0.2±<br>0.0 | 85.2<br>±7.8 | 108.<br>0±13<br>.9 | 19.4<br>±1.0 | 16.9<br>±1.4 | 50.8<br>±6.3 | 0.2±<br>0.0 | 87.3<br>±8.9 | 45.1<br>±1.0 | 4.85<br>±0.2 | 0.4±<br>0.1 | 618±<br>32.9       |
|             | 20/21 | F 1 | 114.<br>0±5.<br>7 | 20.2<br>±1.0 | 17.9<br>±1.0 | 50.3<br>±4.8 | 0.2±<br>0.0 | 88.6<br>±3.1 | 104.<br>0±5.<br>5  | 20.7<br>±0.5 | 17.9<br>±0.6 | 43.7<br>±2.3 | 0.2±<br>0.0 | 86.5<br>±2.9 | 46.8<br>±0.4 | 10.7<br>±0.4 | 0.5±<br>0.0 | 593±<br>40.7       |
|             |       | F 2 | 115.<br>0±2.<br>3 | 19.9<br>±1.1 | 17.5<br>±1.2 | 53.1<br>±4.3 | 0.2±<br>0.0 | 88.0<br>±3.5 | 98.5<br>±5.2       | 19.1<br>±0.3 | 15.8<br>±0.8 | 40.0<br>±5.0 | 0.2±<br>0.0 | 82.7<br>±4.2 | 45.0<br>±0.9 | 5.8±<br>0.4  | 0.5±<br>0.0 | 439.<br>0±23<br>.4 |
| IS Conditor | 19/20 | F 1 | 96.4<br>±8.4      | 19.6<br>±0.5 | 17.6<br>±1.0 | 57.7<br>±7.3 | 0.2±<br>0.0 | 89.8<br>±3.5 | 87.4<br>±4.8       | 20.5<br>±0.7 | 17.0<br>±1.0 | 55.0<br>±5.2 | 0.2±<br>0.0 | 82.9<br>±4.1 | 37.8<br>±2.6 | 9.87<br>±1.0 | 0.4±<br>0.0 | 897.<br>0±82<br>.3 |
|             |       | F 2 | 91.8<br>±6.2      | 20.7<br>±0.7 | 16.7<br>±1.5 | 44.8<br>±5.9 | 0.2±<br>0.0 | 80.6<br>±5.1 | 83.6<br>±3.6       | 18.5<br>±0.7 | 15.2<br>±0.6 | 49.8<br>±6.0 | 0.2±<br>0.0 | 82.2<br>±3.4 | 39.9<br>±0.6 | 6.16<br>±0.2 | 0.4±<br>0.1 | 620.<br>0±24<br>.3 |
|             | 20/21 | F 1 | 87.4<br>±4.8      | 20.3<br>±0.7 | 17.5<br>±1.1 | 54.9<br>±5.2 | 0.2±<br>0.0 | 86.2<br>±4.6 | 81.2<br>±5.0       | 19.5<br>±0.7 | 16.3<br>±1.1 | 48.5<br>±5.8 | 0.2±<br>0.0 | 83.5<br>±3.5 | 41.8<br>±0.9 | 11.3<br>±0.4 | 0.5±<br>0.0 | 642.<br>0±59<br>.2 |
|             |       | F 2 | 81.8<br>±4.3      | 18.8<br>±1.2 | 15.9<br>±1.1 | 50.1<br>±6.0 | 0.2±<br>0.0 | 84.7<br>±4.2 | 73.1<br>±4.7       | 18.5<br>±1.3 | 15.0<br>±0.9 | 39.4<br>±4.2 | 0.2±<br>0.0 | 81.2<br>±4.5 | 41.4<br>±1.1 | 6.1±<br>0.3  | 0.5±<br>0.0 | 560.<br>0±22<br>.0 |
| RGT         | 19/20 | F 1 | 89.3<br>±6.6      | 19.2<br>±0.6 | 17.6<br>±1.1 | 58.1<br>±7.0 | 0.2±<br>0.0 | 91.7<br>±5.0 | 92.3<br>±3.8       | 20.0<br>±0.7 | 17.9<br>±0.7 | 52.0<br>±5.5 | 0.2±<br>0.0 | 89.5<br>±3.6 | 38.7<br>±2.4 | 11.4<br>±0.7 | 0.4±<br>0.0 | 805.<br>0±73<br>.6 |
|             |       | F 2 | 81.4<br>±6.1      | 18.1<br>±0.9 | 15.3<br>±1.0 | 43.2<br>±4.8 | 0.2±<br>0.0 | 84.5<br>±2.4 | 84.0<br>±6.5       | 18.2<br>±0.9 | 16.6<br>±1.1 | 46.8<br>±8.4 | 0.2±<br>0.0 | 91.3<br>±5.8 | 44.9<br>±0.5 | 6.1±<br>0.4  | 0.4±<br>0.1 | 618.<br>0±20<br>.1 |



| V       | Y     | S   | SL                | TS<br>N      | FS           | FF                | SD          | SF           | SL2               | TS<br>N2     | FS2          | GN           | SD2         | SF2          | TK<br>W      | Yie          | HI          | S/m²                |
|---------|-------|-----|-------------------|--------------|--------------|-------------------|-------------|--------------|-------------------|--------------|--------------|--------------|-------------|--------------|--------------|--------------|-------------|---------------------|
|         | 20/21 | F 1 | 76.9<br>±3.4      | 18.4<br>±0.7 | 16.5<br>±0.8 | 49.1<br>±5.0      | 0.2±<br>0.0 | 89.7<br>±3.1 | 72.5<br>±3.6      | 18.1<br>±1.0 | 16.5<br>±1.1 | 48.4<br>±4.4 | 0.2±<br>0.0 | 91.1<br>±3.0 | 42.1<br>±0.6 | 12.2<br>±0.3 | 0.5±<br>0.0 | 767±<br>70.2        |
|         |       | F 2 | 74.8<br>±3.8      | 17.3<br>±0.5 | 15.2<br>±0.6 | 45.1<br>±5.8      | 0.2±<br>0.0 | 87.8<br>±1.9 | 69.1<br>±4.6      | 17.1<br>±0.9 | 14.3<br>±0.9 | 37.1<br>±4.9 | 0.2±<br>0.0 | 83.6<br>±3.5 | 43.4<br>±1.2 | 5.8±<br>0.3  | 0.5±<br>0.0 | 496.<br>0±16<br>.2  |
| Tobak   | 19/20 | F 1 | 107±<br>5.1       | 20.8<br>±0.4 | 18.3<br>±0.7 | 51.7<br>±4.9      | 0.2±<br>0.0 | 88.0<br>±2.5 | 82.5<br>±7.8      | 19.6<br>±1.0 | 17.6<br>±1.0 | 57.6<br>±5.7 | 0.2±<br>0.0 | 89.8<br>±2.2 | 37.0<br>±1.8 | 10.5<br>±0.4 | 0.3±<br>0.1 | 882.<br>0±53<br>.8  |
|         |       | F 2 | 97.4<br>±4.6      | 18.8<br>±0.6 | 16.8<br>±0.9 | 51.8<br>±7.0      | 0.2±<br>0.0 | 89.5<br>±5.9 | 84.0<br>±5.5      | 18.8<br>±0.4 | 16.3<br>±0.5 | 53.7<br>±6.9 | 0.2±<br>0.0 | 86.7<br>±2.7 | 44.7<br>±0.8 | 6.6±<br>0.3  | 0.4±<br>0.2 | 528.<br>0±21<br>.2  |
|         | 20/21 | F 1 | 91.9<br>±7.0      | 20.0<br>±1.1 | 18.3<br>±1.6 | 52.6<br>±8.2      | 0.2±<br>0.0 | 91.4<br>±4.3 | 88.3<br>±5.0      | 19.7<br>±0.5 | 17.5<br>±0.7 | 48.2<br>±4.0 | 0.2±<br>0.0 | 88.8<br>±3.2 | 40.3<br>±1.7 | 11.7<br>±0.3 | 0.6±<br>0.0 | 790.<br>0±52<br>.7  |
|         |       | F 2 | 87.3<br>±8.7      | 18.4<br>±0.7 | 15.9<br>±1.2 | 42.7<br>±8.2      | 0.2±<br>0.0 | 86.3<br>±3.9 | 85.0<br>±8.1      | 18.7<br>±0.9 | 16.7<br>±1.1 | 45.1<br>±7.5 | 0.2±<br>0.0 | 89.3<br>±2.5 | 40.8<br>±0.4 | 6.1±<br>0.4  | 0.5±<br>0.0 | 489.<br>0±19<br>.7  |
| Tonnage | 19/20 | F 1 | 97.7<br>±4.8      | 20.3<br>±1.1 | 17.8<br>±1.5 | 58.7<br>±7.3      | 0.2±<br>0.0 | 87.6<br>±4.4 | 76.9<br>±3.4      | 18.4<br>±0.7 | 16.4<br>±0.8 | 49.0<br>±5.0 | 0.2±<br>0.0 | 89.1<br>±3.6 | 36.2<br>±0.5 | 10.3<br>±0.3 | 0.3±<br>0.0 | 925.<br>0±12<br>5.5 |
|         |       | F 2 | 86.8<br>±7.7      | 18.3<br>±1.0 | 16.9<br>±1.2 | 60.0<br>±10.<br>2 | 0.2±<br>0.0 | 92.4<br>±5.1 | 77.1<br>±5.4      | 17.6<br>±0.7 | 15.1<br>±0.6 | 45.3<br>±5.6 | 0.2±<br>0.0 | 85.9<br>±5.0 | 43.9<br>±1.4 | 6.4±<br>0.4  | 0.4±<br>0.1 | 545.<br>0±21<br>.8  |
|         | 20/21 | F 1 | 83.0<br>±7.6      | 19.5<br>±1.0 | 17.8<br>±1.1 | 57.7<br>±5.7      | 0.2±<br>0.0 | 91.2<br>±2.6 | 75.1<br>±6.0      | 19.2<br>±1.0 | 17.0<br>±1.0 | 52.2<br>±6.0 | 0.3±<br>0.0 | 88.6<br>±3.1 | 40.8<br>±1.8 | 12.0<br>±0.1 | 0.5±<br>0.0 | 757.<br>0±10<br>2.8 |
|         |       | F 2 | 82.6<br>±6.1      | 18.6<br>±0.5 | 16.6<br>±0.8 | 53.2<br>±7.0      | 0.2±<br>0.0 | 89.2<br>±2.7 | 73.1<br>±3.3      | 17.9<br>±1.0 | 15.8<br>±1.1 | 45.0<br>±6.3 | 0.2±<br>0.0 | 88.2<br>±3.2 | 36.9<br>±0.7 | 6.3±<br>0.5  | 0.4±<br>0.0 | 404.<br>0±16<br>.2  |
| Tybalt  | 19/20 | F 1 | 107.<br>0±2.<br>1 | 22.7<br>±0.8 | 20.6<br>±1.1 | 59.9<br>±3.0      | 0.2±<br>0.0 | 90.7<br>±2.6 | 93.1<br>±12.<br>8 | 20.9<br>±0.7 | 19.3<br>±1.1 | 56.1<br>±7.0 | 0.2±<br>0.0 | 92.3<br>±4.1 | 40.7<br>±0.8 | 9.77<br>±0.8 | 0.3±<br>0.0 | 1187<br>.0±5<br>0.9 |
|         |       | F 2 | 92.8<br>±7.1      | 19.5<br>±1.3 | 18.3<br>±1.2 | 58.5<br>±6.9      | 0.2±<br>0.0 | 93.9<br>±3.2 | 82.8<br>±3.6      | 19.1<br>±0.7 | 16.9<br>±0.7 | 46.5<br>±4.2 | 0.2±<br>0.0 | 88.5<br>±3.8 | 44.7<br>±0.8 | 6.1±<br>0.2  | 0.5±<br>0.1 | 504.<br>0±10<br>.4  |
|         | 20/21 | F 1 | 93.5<br>±12.<br>7 | 20.9<br>±0.7 | 19.2<br>±1.0 | 56.0<br>±7.0      | 0.2±<br>0.0 | 91.9<br>±4.0 | 80.5<br>±5.6      | 18.9<br>±1.0 | 17.9<br>±0.9 | 47.0<br>±3.3 | 0.2±<br>0.0 | 94.8<br>±2.3 | 43.2<br>±1.2 | 11.6<br>±0.6 | 0.5±<br>0.0 | 805±<br>34.6        |
|         |       | F 2 | 83.0<br>±3.0      | 19.3<br>±0.5 | 17.3<br>±0.7 | 47.3<br>±4.2      | 0.2±<br>0.0 | 89.7<br>±3.4 | 78.0<br>±4.3      | 18.8<br>±1.0 | 16.5<br>±1.1 | 42.2<br>±4.8 | 0.2±<br>0.0 | 87.7<br>±2.7 | 41.1<br>±0.3 | 6.2±<br>0.6  | 0.4±<br>0.0 | 462.<br>0±4.<br>0   |

Abbreviations: V=Variety, Y=Year, S=Site, SL=Spike Length, TSN=Total Spikelets Number, FS=Fertile Spikelets, FF=Fertile Flowers, SD=Spike Density, SF=Spike Fertility, SL2=Spike Length 2, TSN2= Total Spikelet Number 2, FS2= Fertile Spikelets, GN= Grain Number, SD2= Spike Density 2, SF2=Spike Fertility 2, TKW=Thousand Kernel Weight, Yie=Yield, HI=Harvest Index, s/m²=spikes/m², the red marked values were not statistically significant  $p > 0.05$
